# Supplementary figures and images for: Disruption of d-alanyl esterification of Staphylococcus aureus cell wall teichoic acid by the β-lactam resistance modifier (−)-epicatechin gallate
Source: PubMed Central journal article supplement — J Antimicrob Chemother. 2009 Mar 22;63(6):1156–62. doi: 10.1093/jac/dkp094 (PMC2680342; doi:10.1093/jac/dkp094), 2009-03-22

## Supplementary data

Figure S1. NMR spectral data.

$^1\text{H-NMR}$

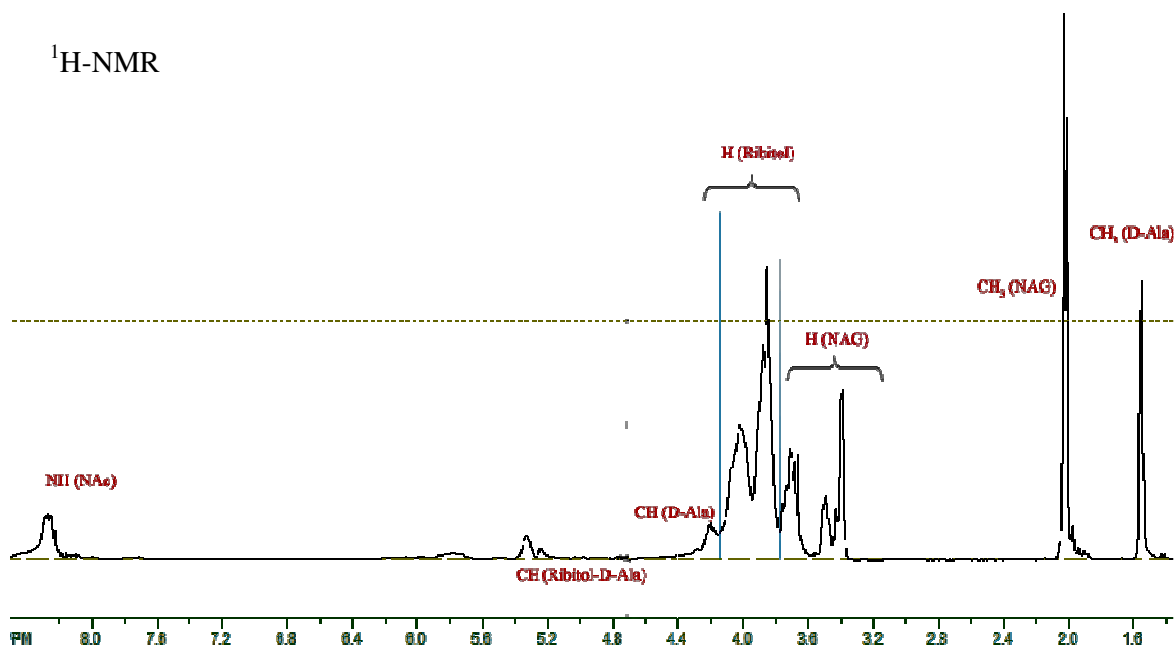

$^{13}\text{C-NMR}$

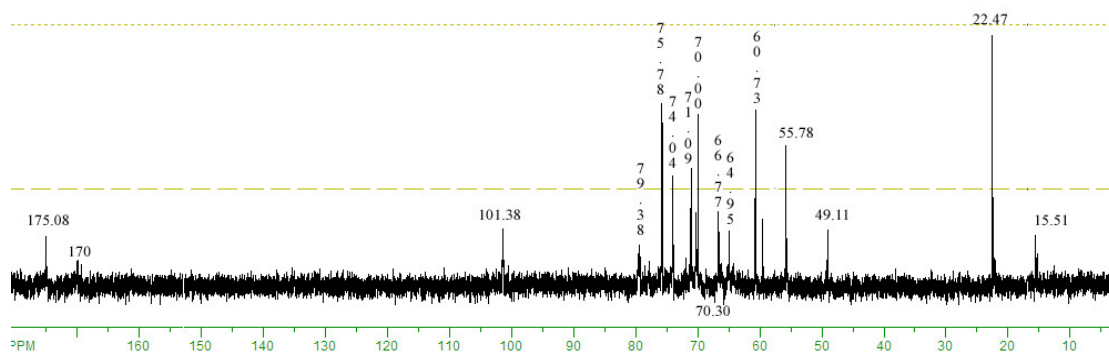

$^{31}\text{P-NMR}$

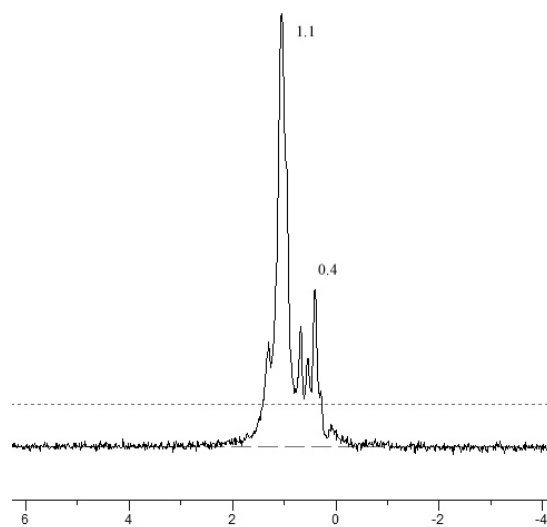

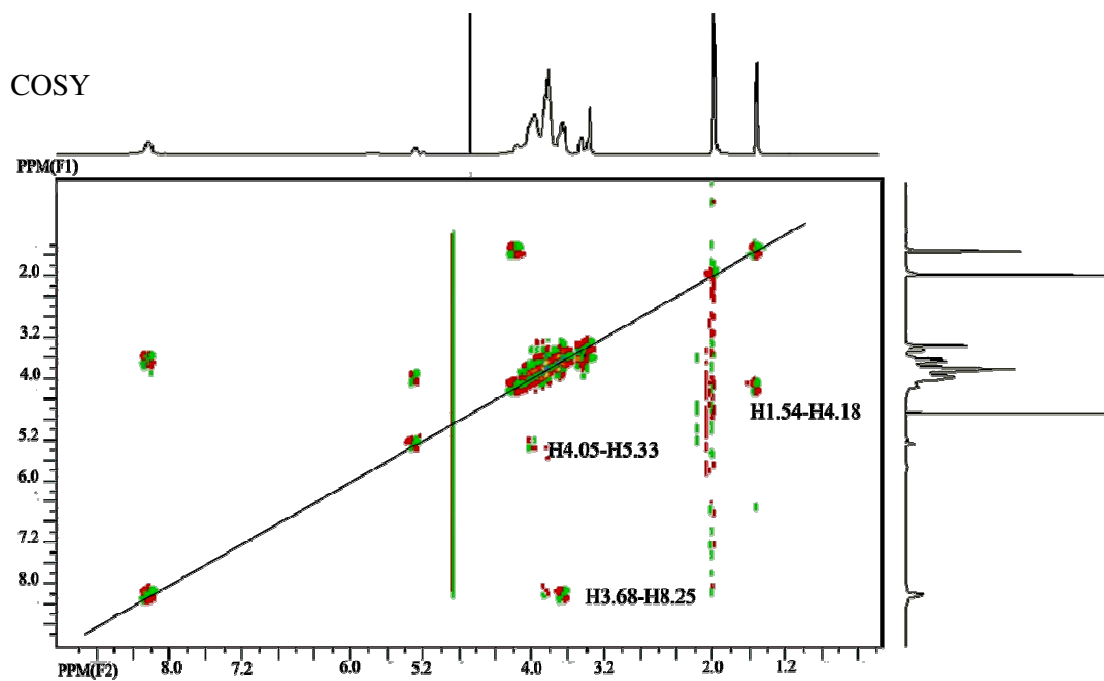

$^1\text{H}$ - $^{31}\text{P}$ -NMR

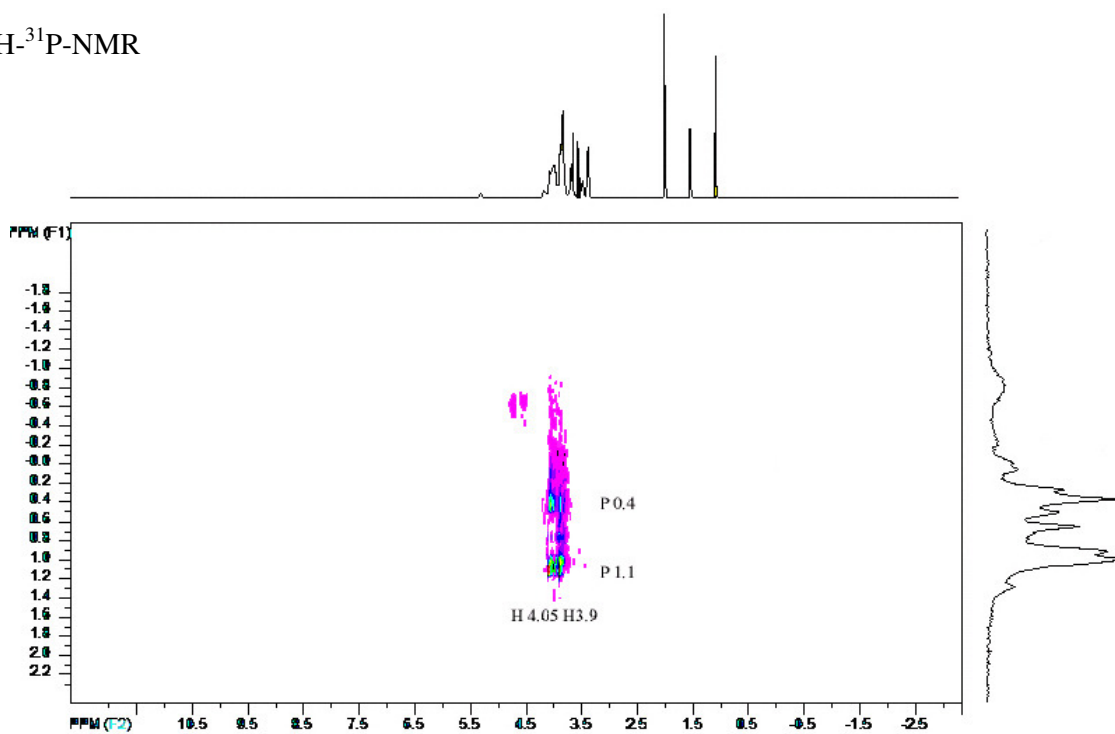

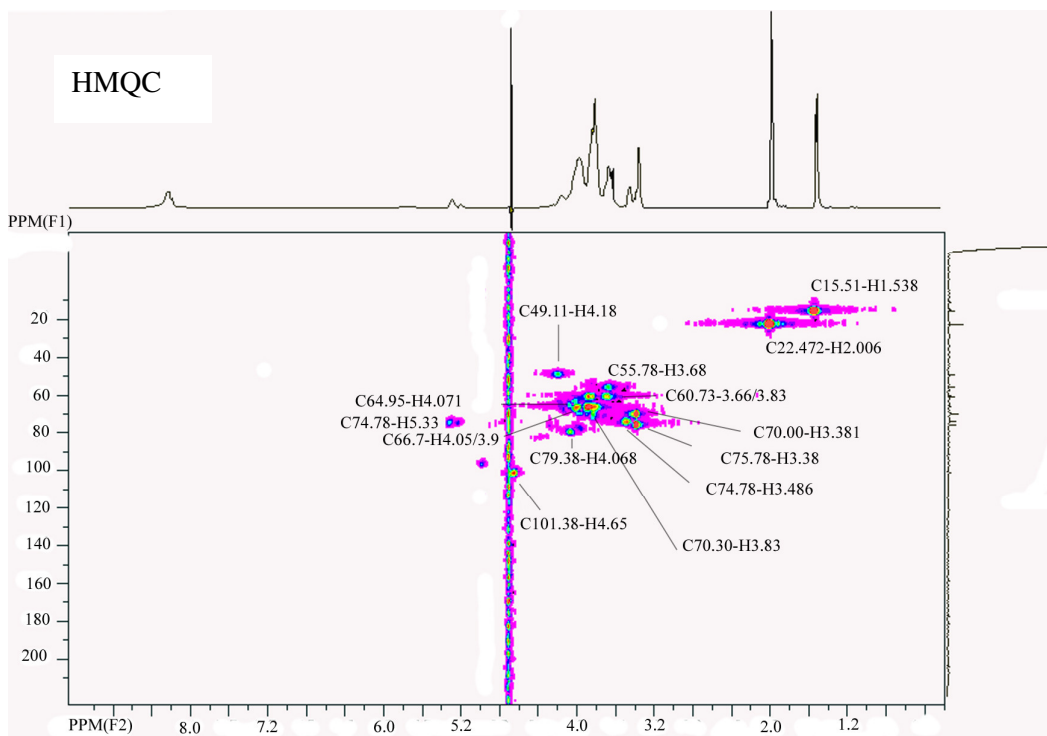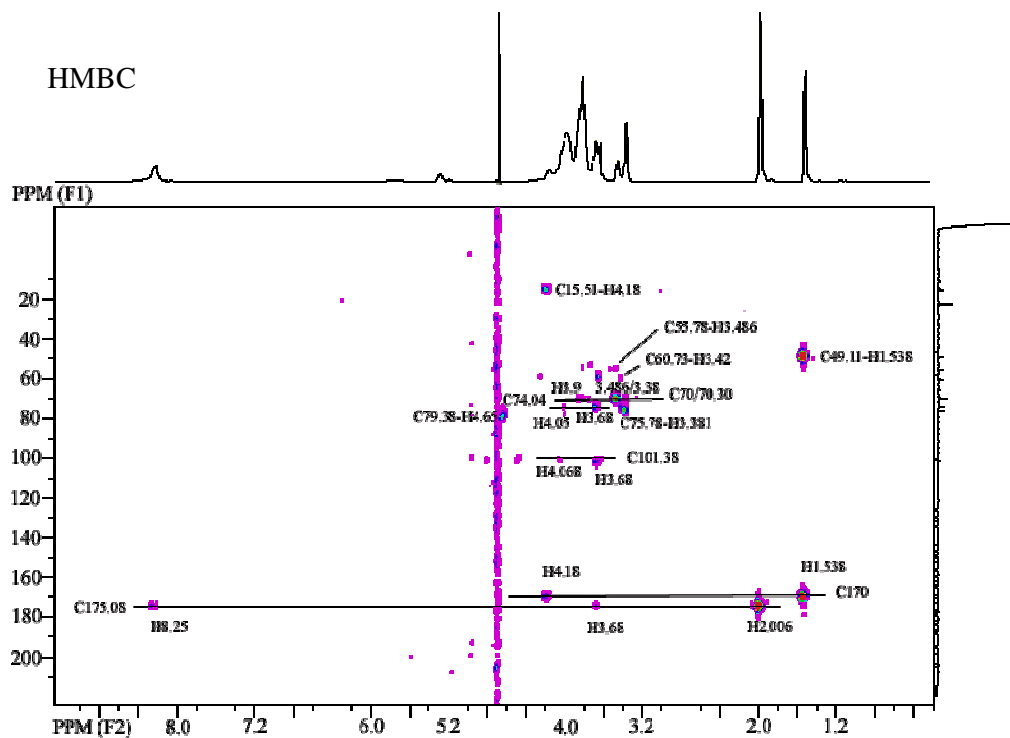

Supplement: dkp094_1.pdf [file dkp094_1.pdf]
